# Supplementary material
Source: publisher figshare collection journal article supplement (https://springernature.figshare.com/ndownloader/files/13495763)
Supplement: Supplementary file 1 [file 13495763]

---

|                |                             |               |                                 |                    |
|----------------|-----------------------------|---------------|---------------------------------|--------------------|
| <b>Region:</b> | <b>Committee Secretary:</b> | <b>Phone:</b> | <b>Our date:</b>                | <b>Reference</b>   |
| REK vest       | Øyvind Straume              | +47 55978497  | 08.11.2016                      | 2014/1911/REK vest |
|                |                             |               | <b>Your date:</b><br>31.10.2016 |                    |

Bjarne Robberstad

Senter for Internasjonal Helse/Institutt for Global helse og Samfunnsmedisin

### **2014/1911 Malariaforebygging etter behandling av alvorleg anemi (PDM)**

**Institution responsible for the research:** Liverpool School of Tropical Medicine, University of Bergen

**Project manager:** Bjarne Robberstad

With reference to your application regarding the abovementioned project. Chairman of The Regional Committee for Medical and Health Research Ethics (REC Western Norway) reviewed the application pursuant to The Health Research Act § 11

#### **Assesment**

##### *Change to project*

The project manager wants to add malaria smears to RDT as option to diagnose clinical malaria for unscheduled visits.

Chairman of REC Western Norway reviewed the change

##### *Assessment*

*REC Western Norway has no objections to the proposed amendment of the study.*

#### **Decision**

*REC Western Norway approves the project amendment in accordance with the submitted application.*

The decision of the committee may be appealed to the National Committee for Research Ethics in Norway. The appeal should be sent to the Regional Committee for Research Ethics in Norway, West. The deadline for appeals is three weeks from the date on which you receive this letter.

Sincerely

Ansgar Berg  
Prof. Dr.med  
Chairman

Øyvind Straume  
Committee Secretary

**Kopi til:** *postmottak@uib.no*
