# Supplementary material
Source: publisher figshare collection journal article supplement (https://springernature.figshare.com/ndownloader/files/13495763)
Supplement: Supplementary file 3 [file 13495763]

Professor Feiko ter Kuile  
Liverpool School of Tropical Medicine  
Pembroke Place  
L3 5QA

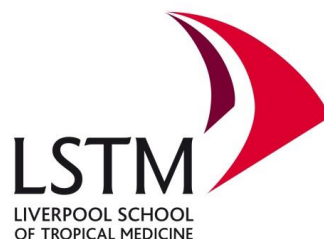

Pembroke Place,  
Liverpool, L3 5QA, UK  
Tel: +44(0)151 705 3100  
Fax: +44(0)151 705 3370

[www.lstmed.ac.uk](http://www.lstmed.ac.uk)

Friday, 13 April 2018

Dear Professor ter Kuile,

**Research Protocol (14-034) Malaria chemoprevention with monthly treatment with dihydroartemisinin-piperaquine for the post-discharge management of severe anaemia in children aged less than 5 years in Uganda and Kenya: a 3-year, multi-centre, parallel-group, two-arm, randomized placebo controlled trial (PMC study)**

| Protocol Number | Date             | Date Received    |
|-----------------|------------------|------------------|
| v4.0            | 06 February 2018 | 07 February 2018 |

Thank you for your correspondence of 7 February 2018 providing the LSTM Research Ethics Committee and LSTM Research Governance Manager with details of an amendment to protocol.

This amendment has now been reviewed, noted and accepted on the behalf of the Committee and the LSTM, as study Sponsor. Please continue to adhere to the conditions of approval and to update us of any further changes to the study that may arise.

Please continue to adhere to the original conditions of approval following notification of study conclusion with specific regard to confidentiality and data management.

Yours sincerely,

A handwritten signature in dark ink, appearing to read "Angela Obasi", written over a light blue horizontal line.

**Dr Angela Obasi**  
**Chair**  
**LSTM Research Ethics Committee**

Yours sincerely,

A handwritten signature in blue ink, appearing to read "C. Henry", written over a light blue horizontal line.

**Mr Carl Henry**  
**LSTM Research Governance Manager**  
**LSTM Research Governance and Ethics Office**
