# Supplementary material
Source: publisher figshare collection journal article supplement (https://springernature.figshare.com/ndownloader/files/13495763)
Supplement: Supplementary file 4 [file 13495763]

|                |                       |                 |                    |                                        |
|----------------|-----------------------|-----------------|--------------------|----------------------------------------|
| <b>Region:</b> | <b>Saksbehandler:</b> | <b>Telefon:</b> | <b>Vår dato:</b>   | <b>Vår referanse:</b>                  |
| REK vest       | Fredrik Rongved       | 55978498        | 22.12.2017         | 2014/1911/REK vest                     |
|                |                       |                 | <b>Deres dato:</b> | <b>Deres referanse:</b>                |
|                |                       |                 | 11.12.2017         | Not required for trials outside the EU |

Vår referanse må oppgis ved alle henvendelser

Bjarne Robberstad  
Senter for Internasjonal Helse/Institutt for Global helse og Samfunnsmedisin

#### **2014/1911 Malariaforebygging etter behandling av alvorleg anemi (PDM)**

**Institution responsible for the research:** Liverpool School of Tropical Medicine, University of Bergen  
**Chief Investigator:** Bjarne Robberstad

With reference to your application regarding the above-mentioned project. Chair of The Regional Committee for Medical and Health Research Ethics of Western Norway (REC West) reviewed the application pursuant to The Health Research Act § 11.

#### **Assessment**

##### *Change to project*

Chief investigator wish to change the sample size from 2212 children to about 1066.

The Chair of REC West assessed the changes.

##### *Assessment*

REC West has no objections to the proposed amendment of the study.

#### **Decision**

REC West approves the project amendment in accordance with the submitted application.

##### *The Access to Appeal*

You have access to appeal the decision. The appeal should be sent to REC West. The deadline for appeals is three weeks from the date on which you receive this letter. REC can either grant your appeal or forward it to the National Committee for Research Ethics in Norway (NEM). The decision by NEM is final.

Sincerely

Marit Grønning  
Prof. dr.med.  
Chair

Fredrik Rongved  
Committee Secretary

**Kopi til:** *post@uib.no; carl.henry@lstmed.ac.uk*
