# Supplementary material
Source: publisher figshare collection journal article supplement (https://springernature.figshare.com/ndownloader/files/13495763)

# MAKERERE

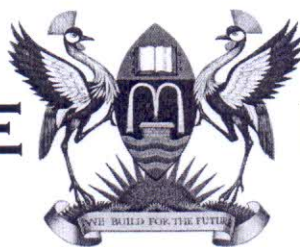

# UNIVERSITY

P.O. Box 7072 Kampala, Uganda  
E-mail: rresearch9@gmail.

Phone: 256 414 533541

Fax: 256 414 541036/0414 532204

## COLLEGE OF HEALTH SCIENCES SCHOOL OF MEDICINE

### RESEARCH ETHICS COMMITTEE

April 18, 2018

**Dr. Richard Idro**  
Department of Paediatrics and Child Health

#### Category of review

- ☐ Initial review
- ☐ Continuing review
- ☒ Amendment
- ☐ Termination of study
- ☐ SAEs

Dear Dr. Idro,

Re: REC REF 2015-125

Title: "Malaria chemoprevention with monthly treatment with dihydroartemisinin-piperaquine for the post-discharge management of severe anaemia in children aged less than 5 years in Uganda and Kenya: A 3-year, multi-centre, parallel-group, two – arm randomized placebo controlled superiority trial" (PMC study)"

Your proposal entitled "Malaria chemoprevention with monthly treatment with dihydroartemisinin-piperaquine for the post-discharge management of severe anaemia in children aged less than 5 years in Uganda and Kenya: A 3-year, multi-centre, parallel-group, two –arm randomized placebo controlled superiority trial" (PMC study)" was initially reviewed and approved by the School of Medicine Research and Ethics committee on September 10<sup>th</sup>, 2015

On February 12<sup>th</sup> 2018, you requested for permission to make some modifications in the study: to re-estimate the study sample size from, 2212 to 1040 because of Limited remaining funds, and Event rate for the primary outcome (post-discharge re-admissions or deaths) that has been observed being about 3-fold higher than the event rate used in the original sample size calculations.

The committee considered these changes on 17<sup>th</sup> April, 2018. On behalf of the committee, I am glad to inform you that these changes have been approved. You may now proceed with the study. But forward regular reports on your study to the committee.

Yours sincerely,

Assoc. Prof. Ponsiano Ocama

Chairman School of Medicine Research & Ethics Committee

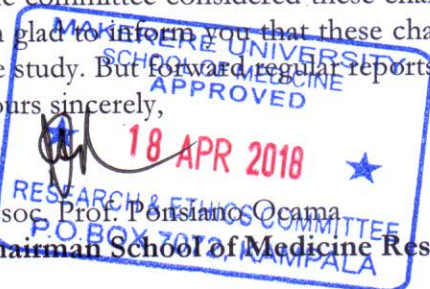

Supplement: Supplementary file 6 [file 13495763]
